# Supplementary material for: In situ 2,5-pyrazinedicarboxylate and oxalate ligands synthesis leading to a microporous europium–organic framework capable of selective sensing of small molecules
Source: Royal Society of Chemistry journal article supplement (doi:10.1039/c0ce00135j), 2010-01-01
Supplement: c0ce00135j.pdf [file c0ce00135j.pdf]

***In situ* 2,5-Pyrazinedicarboxylate and Oxalate Ligands Synthesis Leading to a  
Microporous Europium-Organic Framework Capable of Sensing Small  
Molecules**

Deyun Ma,<sup>a</sup> Weixia Wang,<sup>a</sup> Yingwei Li,<sup>a,\*</sup> Jing Li,<sup>a,b,\*</sup> Carole Daiguebonne,<sup>c</sup> G.  
Calvez,<sup>c</sup> Olivier Guillou<sup>c,\*</sup>

<sup>a</sup> *School of Chemistry and Chemical Engineering, South China University of  
Technology, Guangzhou 510640, P. R. China.* <sup>b</sup> *Department of Chemistry and  
Chemical Biology, Rutgers University, Piscataway, NJ 08854, USA.* <sup>c</sup> *UniVersité  
Européenne de Bretagne-UMR CNRS-INSA 6226, Sciences Chimiques deRennes, 20  
Avenue des buttes de Coësmes, 35043 Rennes, France.*

**Supporting Information**

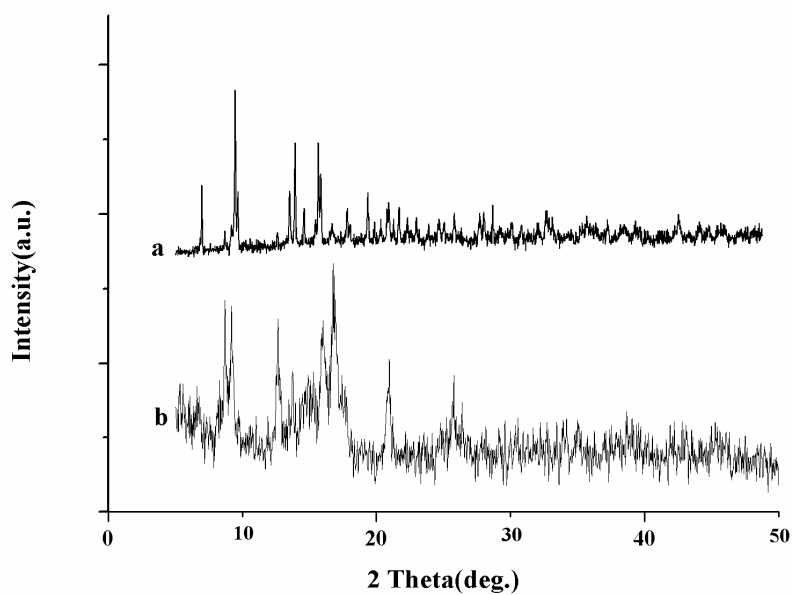

**Fig. S1.** Powder X-ray diffraction patterns of a) as-synthesized **1**, b) **1** after thermal treatment at 120 °C under a dynamic vacuum overnight.

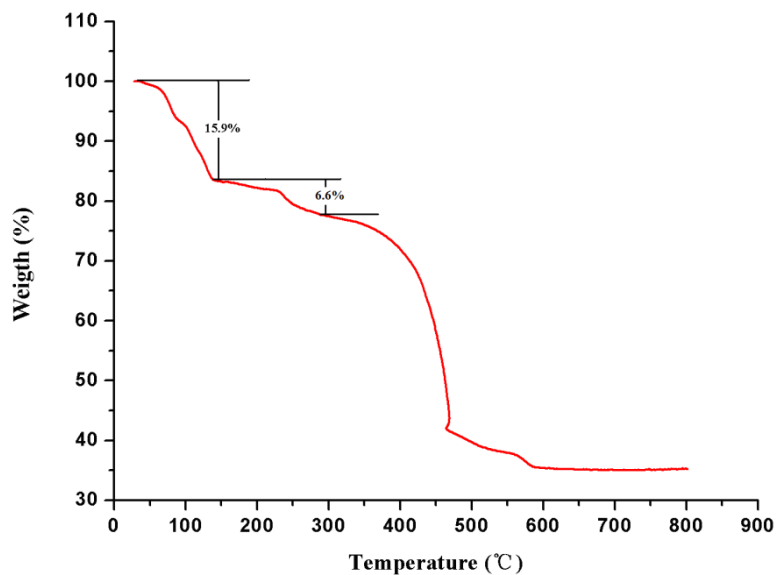

**Fig. S2.** TGA profile for **1**.

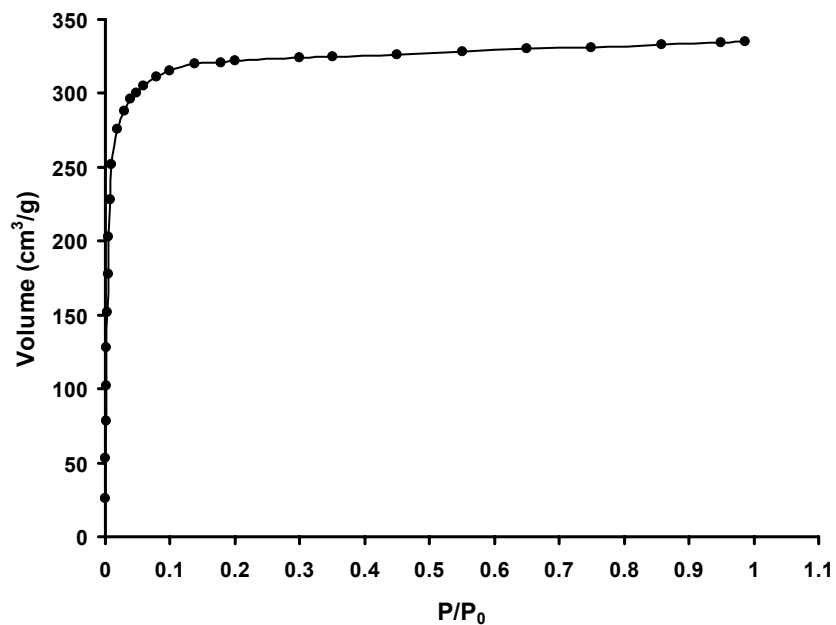

**Fig. S3.** N<sub>2</sub> adsorption isotherm measured at 77 K in **1a**.

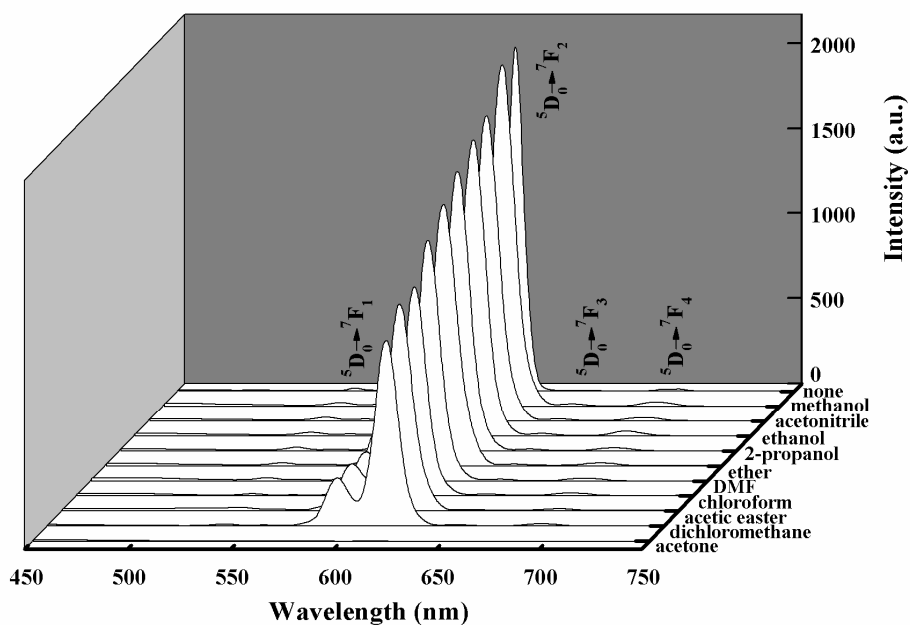

**Fig. S4.** PL spectra of **1a** introduced into various pure solvents when excited at 308 nm.

a)

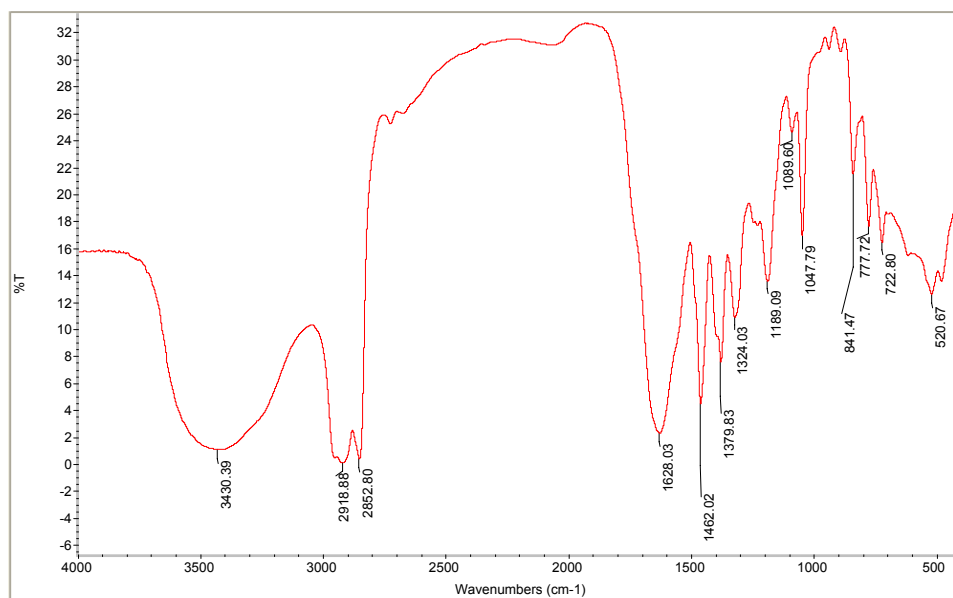

b)

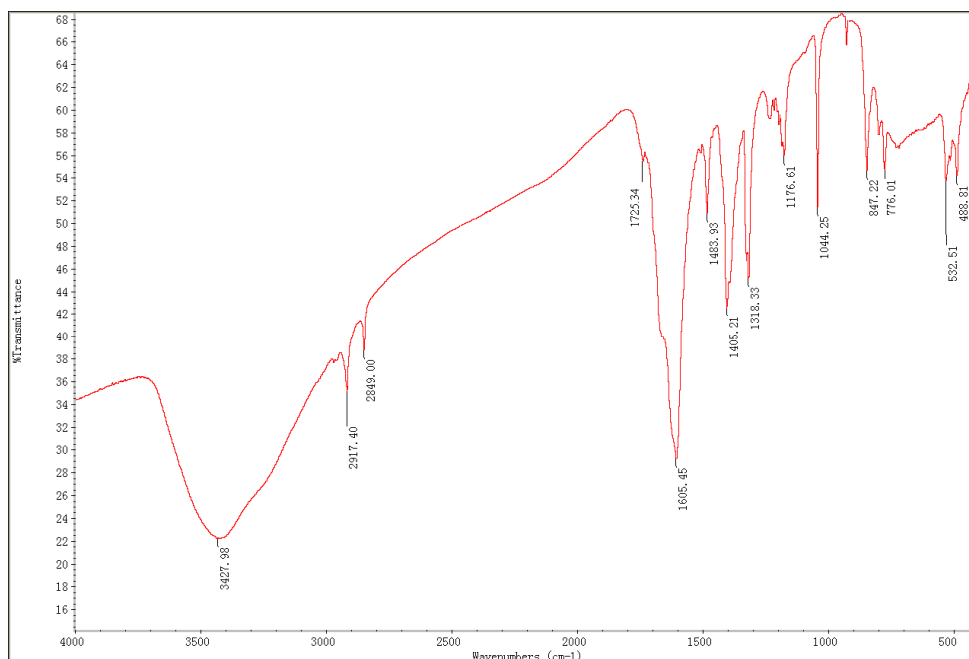

**Fig. S5.** IR spectra of a) as-prepared **1**, b) **1a** after immersed in pure acetone and dried at 40 °C. The peak at 1725 cm<sup>-1</sup>, not present in as-prepared **1**, is attributed to the acetone molecules captured in the microporous framework.

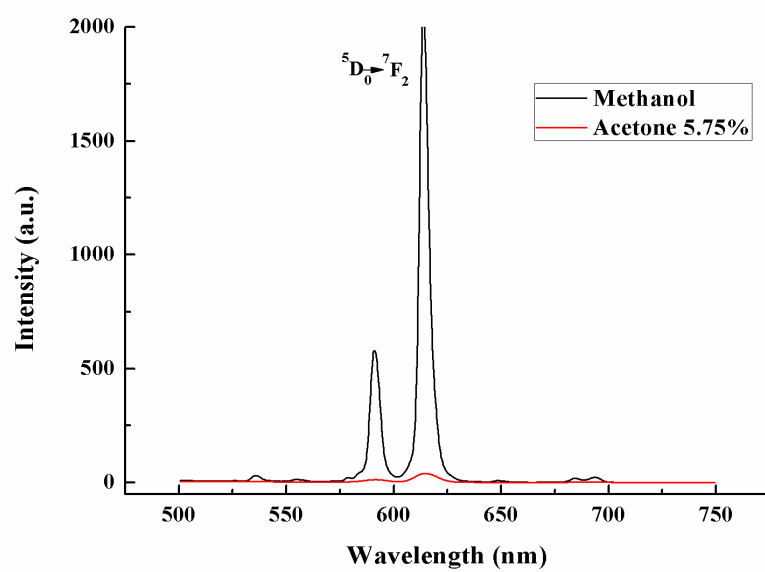

**Fig. S6.** The PL spectra of regenerated **1a** in methanol emulsion (black) and in the presence of 5.75% of acetone solvent (red).
